# Supplementary material
Source: PubMed Central journal article supplement (PMC8505876)
Supplement: koab189_supplementary_data.pdf [file koab189_supplementary_data.pdf]

### Supplemental Table S1. Examples of habitats and growth habits for duckweed.

| Species                     | Size (length / width / length to width ratio) | Morphological features |                        | Turion formation | Anthocyanines | Climate                      | Species distribution                                         |  | Invasiveness                   | Reference |
|-----------------------------|-----------------------------------------------|------------------------|------------------------|------------------|---------------|------------------------------|--------------------------------------------------------------|--|--------------------------------|-----------|
|                             |                                               | Roots                  | Flowering <sup>a</sup> |                  |               |                              | Region                                                       |  |                                |           |
| <i>Spirodela polyrrhiza</i> | 1.5-10 mm / 1.5-8.0 / 1-1.5                   | multiple               | very rarely            | present          | present       | cold temperate-tropical      | cosmopolitan (except southern and eastern South America)     |  | n.s.                           | 1         |
| <i>Lemna minor</i>          | 1-10 mm / 0.6-7 mm / 1,3-2                    | single                 | occasionally           | absent           | present       | cold temperate-mediterranean | Africa, Asia, Europe, North America, Oceania                 |  | introduced to Oceania          | 1         |
| <i>Lemna minuta</i>         | 0.8-4 mm / 0.5-2.5 mm / 1-2                   | single                 | occasionally           | absent           | absent        | temperate-subtropical        | Central America, Europe, Japan, North America, South America |  | introduced to Europe and Japan | 1,2       |
| <i>Lemna gibba</i>          | 1-8 mm / 0.8-6 mm / 1-1.5                     | single                 | often                  | absent           | present       | temperate - mediterranean    | cosmopolitan (except Oceania)                                |  | introduced to Japan            | 1         |
| <i>Lemna aequinoctialis</i> | 1-6,5 mm / 0.8-4.5 mm / 1-3                   | single                 | often                  | present          | absent        | warm temperate - tropical    | cosmopolitan                                                 |  | introduced to temperate zones  | 1,3       |
| <i>Wolffia microscopica</i> | 0.4-1 mm / 0.3-0.8 mm / 1-1.5                 | absent                 | very often             | absent           | absent        | tropical                     | India, Pakistan                                              |  | n.s.                           | 1,3       |
| <i>Wolffia arrhiza</i>      | 0.5-1.5 mm / 0.4-1.2 mm / 1-1.3               | absent                 | occasionally           | present          | absent        | temperate-tropical           | Africa, Brazil, Europe, Western Asia                         |  | n.s.                           | 1,3       |
| <i>Wolffiella gladiata</i>  | 3-9 mm / 0.25-0.80 mm / 4-20                  | absent                 | occasionally           | absent           | absent        | temperate                    | North America                                                |  | rarely distributed by man      | 1,3       |

**References and notes**

n.s. not specified

1 Landolt, E. (1986). Biosystematic investigation in the family of duckweeds ("Lemnaceae"). Vol. 2 : the family of "Lemnaceae" : a monographic study. Volume 1. Veröffentlichungen des Geobotanischen Institutes der Eidg. Tech.Hochschule, Stiftung Rübel, in Zürich

2 Les, D., Landolt, E., & Crawford, D. (1997). Systematics of the Lemnaceae (duckweeds): Inferences from micromolecular and morphological data. *Plant Systematics and Evolution*, 204 (3/4), 161-177

3 Bog, M., Appenroth, K.J. and Sree, K.S. (2020). Key to the determination of taxa of Lemnaceae: an update. *Nordic Journal of Botany*, 38:. doi:10.1111/njb.02658
